# Supplementary material
Source: Springer Nature journal article supplement (https://www.springermedizin.de/resource/supplementary/13058_2011_2944_MOESM9_ESM.pdf/9702954)

**A**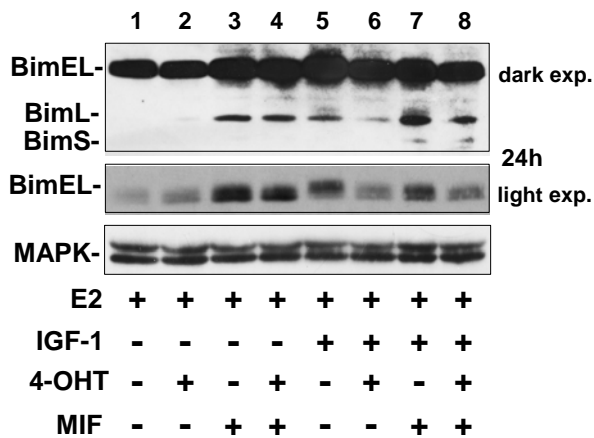**B**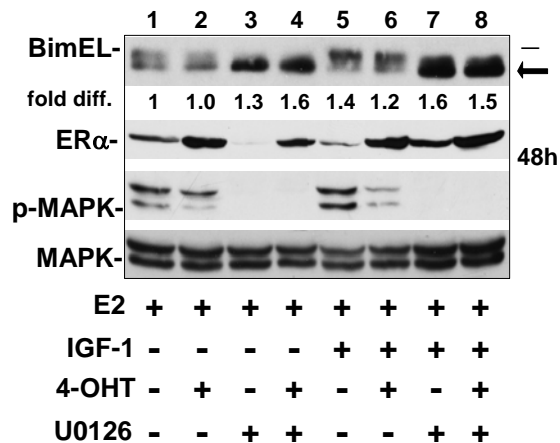**C**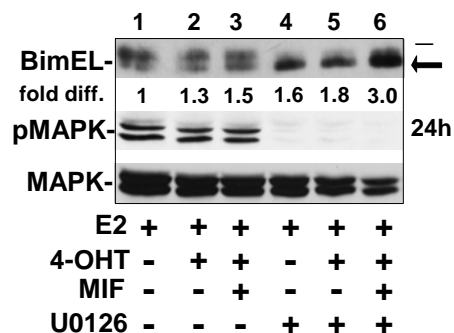**D**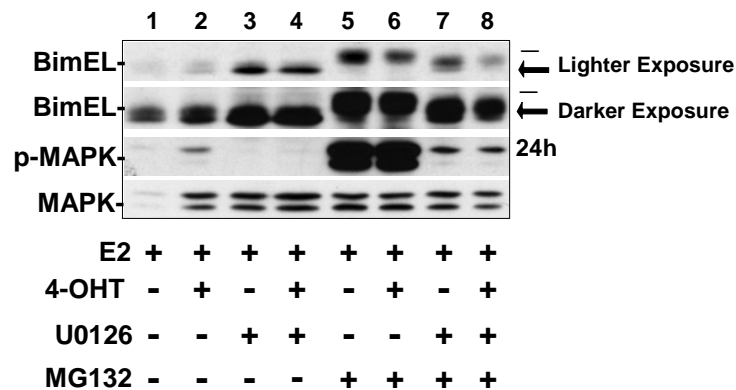**E**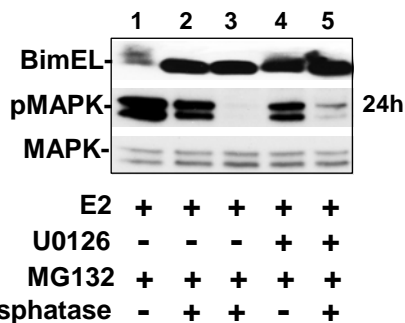**F**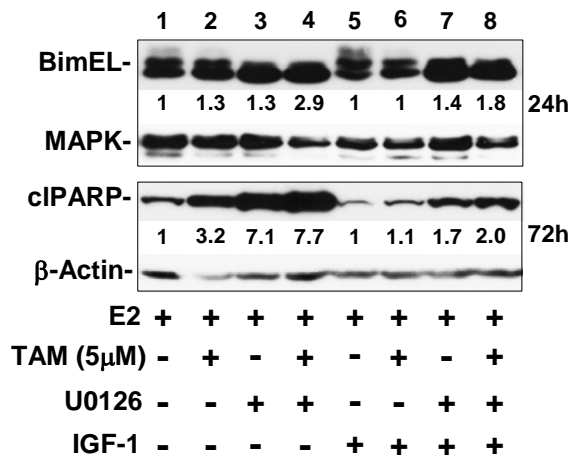

Supplement: MOESM9 [file 9702954]
